# Supplementary material for: Comparative study of holothurin A and echinoside A on inhibiting the high bone turnover via downregulating PI3K/AKT/β-catenin and OPG/RANKL/NF-κB signaling in ovariectomized mice
Source: Royal Society of Chemistry journal article supplement (doi:10.1039/d1fo04357a), 2022-01-01
Supplement: d1fo04357a2.pdf [file d1fo04357a2.pdf]

**Supplementary Table 1. Detail of primers for quantitative fluorescence PCR**

| Gene              | Forward primer (5'-3')           | Reverse primer (5'-3')          |
|-------------------|----------------------------------|---------------------------------|
| <i>ALP</i>        | 5'-TGACCTTCTCCTCCATCC-3'         | 5'-CTTCCTGGGAGTCTCATCCT-3'      |
| <i>OCN</i>        | 5'-CTCCTGGTGTGAAGATGG-3'         | 5'-TGGTGTAGCCGAATAAGC-3'        |
| <i>Collagen I</i> | 5'-GCTCGTGGATTGCCTGGAACA-3'      | 5'-CAGCACCAACAGCACCATCGT-3'     |
| <i>TRAP</i>       | 5'-ACTTGCGACCATTGTTAGCCACAT-3'   | 5'-GCACATAGCCCACACCGTTCTC-3'    |
| <i>Cath-K</i>     | 5'-GCAGCAGAACGGAGGCATTGA-3'      | 5'-GCATGGTTCACATTATCACGGTCAC-3' |
| <i>MMP9</i>       | 5'-CGTGGATAAAGGAGTTCTCTGGTGTG-3' | 5'-GTGGTGGTGGTGGTGGTCTCTA-3'    |
| <i>CB1</i>        | 5'-CTGGTTCTGATCCTGGTGGTGTG-3'    | 5'-GCTGTGTTATTGGCGTGCTTGTG-3'   |
| <i>MKP-1</i>      | 5'-CCTCCTGAGTTCCACTGAGTTCCT-3'   | 5'-GGCAGACCACCGACCTACACAA-3'    |
| <i>PI3K</i>       | 5'-TGCCTGCTCCGTAGTGGTAGAC-3'     | 5'-GGTGGCTGAAGGTGAGGAACTG-3'    |
| <i>AKT</i>        | 5'-CAGATGGACTCAAGAGGCAGGAAGA -3' | 5'-GCAGGACACGGTTCTCAGTAAGC -3'  |
| <i>GSK-3β</i>     | 5'- CTTTCTGTTCCGGCTACCTTC -3'    | 5'- AGCGACCTGGATAACCAATG -3'    |
| <i>β-catenin</i>  | 5'-GATTTCAAGGTGGACGAGGA -3'      | 5'-CACTGTGCTTGGCAAGTTGT -3'     |
| <i>Runx2</i>      | 5'-TTCCAGACCAGCAGCACTCCAT -3'    | 5'-CCGTCAGCGTCAACACCATCAT -3'   |
| <i>OSX</i>        | 5'-CTTCCCAATCCTATTTGCCGTTT -3'   | 5'-CGGCCAGGTTACTAACACCAATCT -3' |
| <i>IKK</i>        | 5'-GACTCCTACCTGAAGCATAAC-3'      | 5'-TCCTTGACACGCAGAATG-3'        |
| <i>IκB</i>        | 5'-ACAGTGAGCAGAGCAGGCATAGT-3'    | 5'-TTGTCAGGAGCAGCACCATTCTTAC-3' |
| <i>NF-κB</i>      | 5'- GCTTACTTTAGCGGCCG-3'         | 5'-CACATAAGGCCCAGAAGCCT-3'      |
| <i>NFATC1</i>     | 5'-GCCTCGAACCCATATCGAGTG-3'      | 5'-AGTTATGGCCAGACAGCACC-3'      |
| <i>β-actin</i>    | 5'-AGCAACTAAACAACCTGCCAGTACTA-3' | 5'-CGATGGCTACCCTTTGCTTCT-3'     |
