# Supplementary figures and images for: Comparative study of holothurin A and echinoside A on inhibiting the high bone turnover via downregulating PI3K/AKT/β-catenin and OPG/RANKL/NF-κB signaling in ovariectomized mice
Source: Royal Society of Chemistry journal article supplement (doi:10.1039/d1fo04357a), 2022-01-01

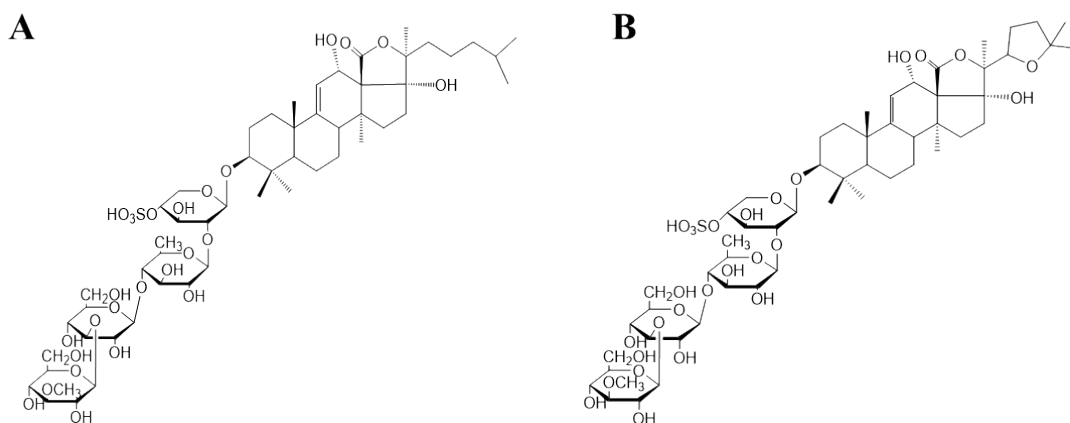

Supplementary Figure 1. The structure of Echinaside A (A) and Holothurin A (B)

Supplement: d1fo04357a1.pdf [file d1fo04357a1.pdf]

1.

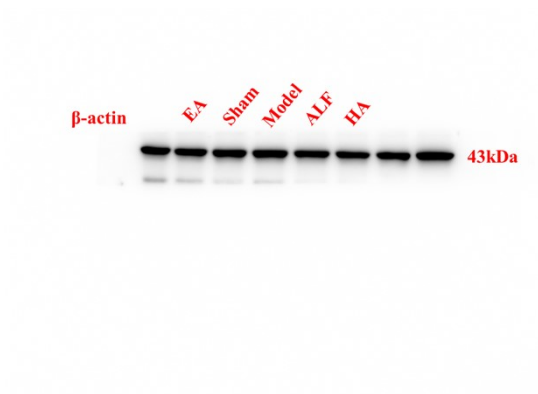

2.

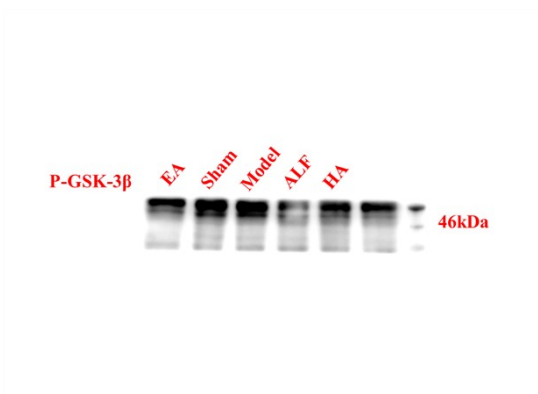

3.

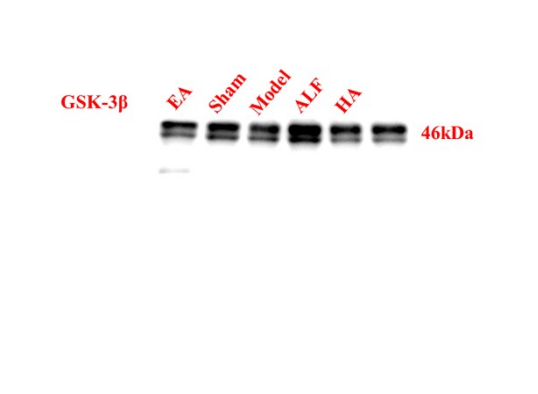

4.

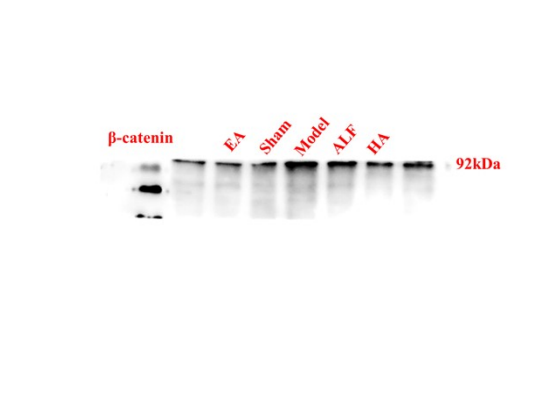

5.

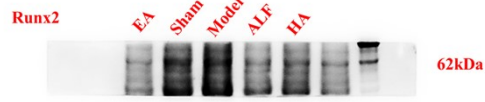

6.

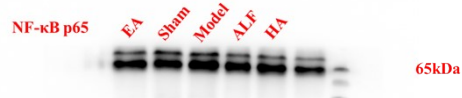

7.

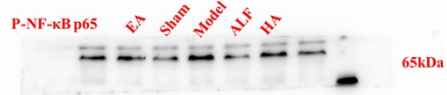

8.

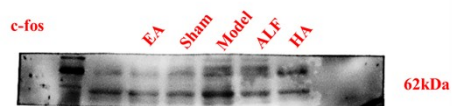

Supplement: d1fo04357a3.pdf [file d1fo04357a3.pdf]
